# Supplementary material for: Variants associated with type 2 diabetes identified by the transethnic meta-analysis study: assessment in American Indians and evidence for a new signal in LPP
Source: PubMed Central journal article supplement (PMC4180905; doi:10.1007/s00125-014-3351-4), 2014-08-12
Supplement: 125_2014_3351_MOESM2_ESM.pdf [file 125_2014_3351_MOESM2_ESM.pdf]

**ESM Table 2:** Characteristics of metabolically studied non-diabetic subjects from the Gila River Indian Community.

|                                                                                                                                                       |                 |
|-------------------------------------------------------------------------------------------------------------------------------------------------------|-----------------|
| <b>n (% Male)</b>                                                                                                                                     | 561 (59%)       |
| <b>Age range (years)</b>                                                                                                                              | 18–46           |
| <b>Mean Age (years) <math>\pm</math> SD</b>                                                                                                           | 26.8 $\pm$ 6.1  |
| <b>Mean BMI (kg/m<sup>2</sup>) <math>\pm</math> SD</b>                                                                                                | 33.4 $\pm$ 7.5  |
| <b>Mean PFAT (%) <math>\pm</math> SD</b>                                                                                                              | 32.3 $\pm$ 8.5  |
| <b>Mean log<sub>10</sub> of glucose disposal rates during insulin infusions (M) (mg·kg EMBS<sup>a-1</sup> · min<sup>-1</sup>) <math>\pm</math> SD</b> | 0.56 $\pm$ 0.12 |
| <b>Mean log<sub>10</sub> acute insulin response<sup>b</sup> (<math>\mu</math>U/ml) <math>\pm</math> SD</b>                                            | 2.32 $\pm$ 0.28 |

<sup>a</sup> EMBS= estimated metabolic body size; <sup>b</sup> only full-heritage Pima Indians with normal glucose tolerance (N=301) were analyzed for acute insulin response.
